# Supplementary material for: 3D printing of implantable elastic PLCL copolymer scaffolds
Source: Royal Society of Chemistry journal article supplement (doi:10.1039/c9sm02396h), 2020-01-01
Supplement: c9sm02396h1.pdf [file c9sm02396h1.pdf]

## **Supporting Information for “3D printing of implantable elastic PLCL copolymer scaffolds”**

Wenshuai Liu<sup>a</sup>, Zujian Feng<sup>a,b</sup>, Wenbin Ou-Yang<sup>c</sup>, Xiangbin Pan<sup>c\*</sup>, Xiaoli Wang<sup>a</sup>,  
Pingsheng Huang<sup>a</sup>, Chuangnian Zhang<sup>a</sup>, Deling Kong<sup>a,d\*</sup>, Weiwei Wang<sup>a\*</sup>

<sup>a</sup> Tianjin Key Laboratory of Biomaterial Research, Institute of Biomedical Engineering,  
Chinese Academy of Medical Sciences and Peking Union Medical College, Tianjin 300192,  
China

<sup>b</sup> Department of Polymer Science and Engineering, Key Laboratory of Systems  
Bioengineering (Ministry of Education), School of Chemical Engineering and Technology,  
Tianjin University, Tianjin 300072, China

<sup>c</sup> Structural Heart Disease Center, National Center for Cardiovascular Disease, China and  
Fuwai Hospital, Chinese Academy of Medical Sciences and Peking Union Medical College,  
Beijing 100037, China

<sup>d</sup> College of Life Sciences, Nankai University, Tianjin 300071, China

Corresponding author: Xiangbin Pan, Email: xiangbin428@hotmail.com; Deling Kong,  
Email: kongdeling@nankai.edu.cn; Weiwei Wang, Email: wwwangtj@163.com

### Characterization of PLLA and PLCL polymers

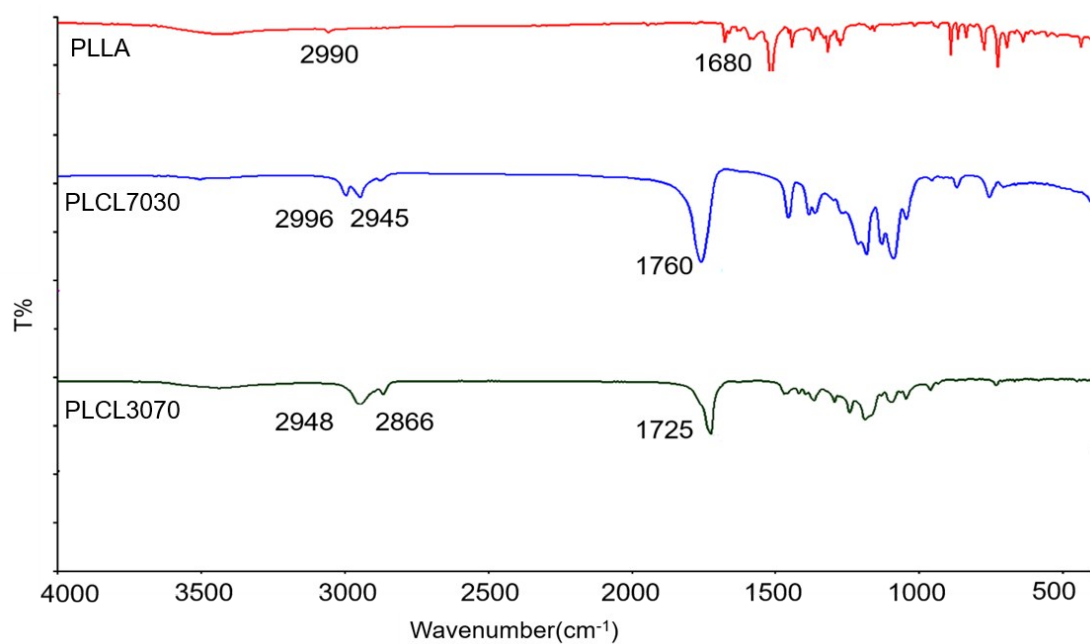

**Figure S1** FTIR spectra of PLLA, PLCL7030, and PLCL3070 scaffolds.

FTIR spectroscopy (Figure S1) showed clear characteristic absorption peaks attributed to ester bands of PLLA, and PLCL at 1680, 1760, 1725 cm<sup>-1</sup>. In addition, -CH- bonds of PLLA at 2990 cm<sup>-1</sup>, and absorption bands of -CH<sub>3</sub>-, -CH<sub>2</sub>-, -CH- in PLCL copolymer at about 2995 cm<sup>-1</sup>, 2945 cm<sup>-1</sup> were also observed.

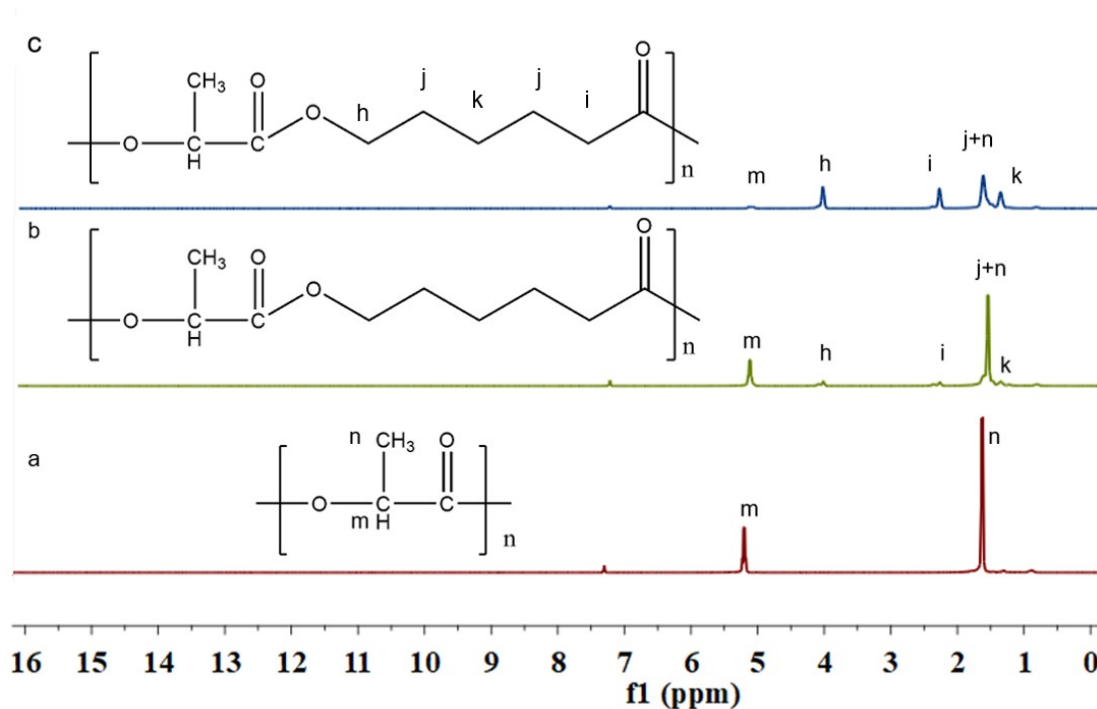

**Figure S2**  $^1\text{H}$  NMR spectra of PLLA (a), PLCL7030 (b), and PLCL3070 (c) polymers.

$\text{CDCl}_3$  was used as the solvent.

Characteristic chemical shifts ( $\delta$ ) at 5.17 ppm ( $-\text{CH}-$ ) and 1.60 ppm ( $-\text{CH}_3-$ ) for PLLA were clearly shown in  $^1\text{H}$  NMR spectrum. And featured peaks for PCL segments at 4.01 ppm ( $-\text{O}-\text{CH}_2-$ ), 2.25 ppm ( $-\text{CH}_2-\text{CO}-$ ), 1.55 ppm ( $-\text{OCH}_2\text{CH}_2\text{CH}_2\text{CH}_2\text{CH}_2\text{CO}-$ ), and 1.30 ppm ( $-\text{OCH}_2\text{CH}_2\text{CH}_2\text{CH}_2\text{CH}_2\text{CO}-$ ) were also found.

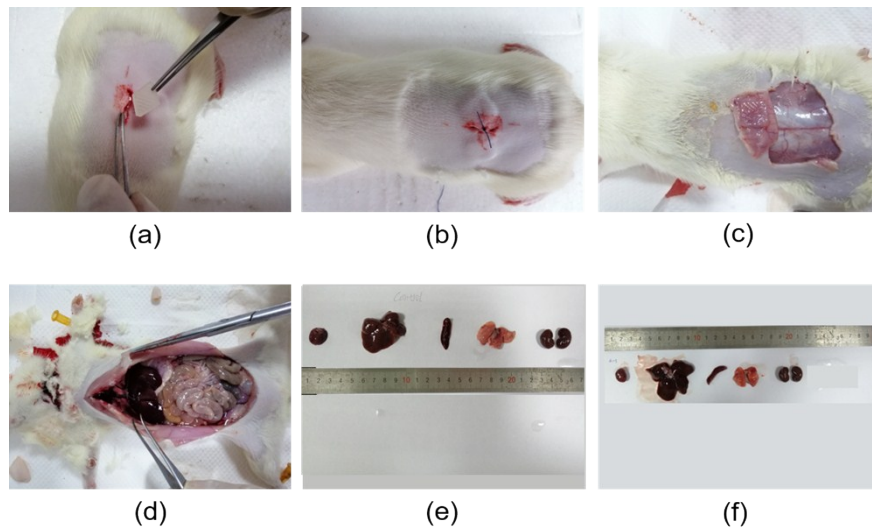

**Figure S3** The implantation (a, b) of scaffolds and after 7 days, the scaffold was surrounded by cells (c). (d) The morphology of viscera after scaffold implantation. The morphology of heart, liver, spleen, lung and kidney from the control (e) and experiment group (f), respectively.

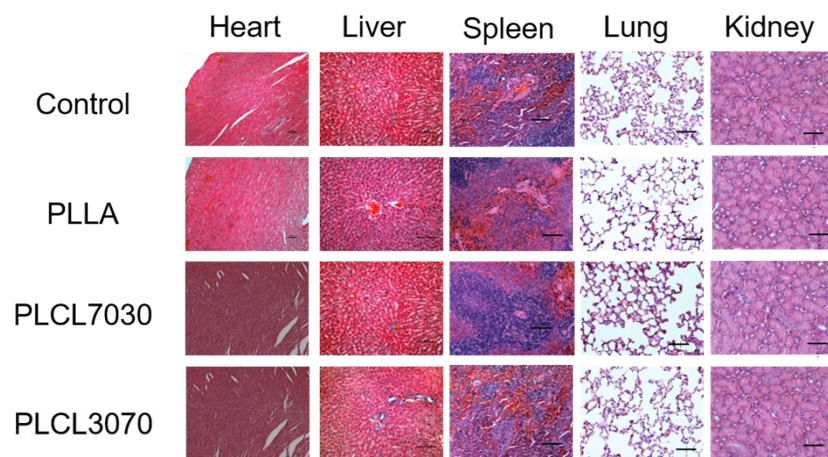

**Figure S4** Histological evaluation of heart, liver, spleen, lung, and kidney. Representative images of H&E stained sections of subcutaneously implanted PLLA, PLCL7030, and PLCL3070 scaffolds with surrounding tissues (Scale bar=100 μm).

**Table S1** Organ mass in SD mice with scaffolds after 1 week.

| Groups   | Organ weight/body weight ratio (g/100g) for |           |           |
|----------|---------------------------------------------|-----------|-----------|
|          | Liver                                       | Spleen    | Kidney    |
| Control  | 2.87±0.17                                   | 0.17±0.04 | 0.78±0.04 |
| PLLA     | 3.14±0.11                                   | 0.18±0.04 | 0.79±0.05 |
| PLCL7030 | 3.10±0.22                                   | 0.20±0.02 | 0.75±0.05 |
| PLCL3070 | 3.44±0.18                                   | 0.21±0.03 | 0.75±0.01 |

**Table S2** Organ mass in SD mice with scaffolds after 4 weeks.

| Groups   | Organ weight/body weight ratio (g/100g) for |           |           |
|----------|---------------------------------------------|-----------|-----------|
|          | Liver                                       | Spleen    | Kidney    |
| Control  | 3.39±0.11                                   | 0.23±0.05 | 0.56±0.04 |
| PLLA     | 3.31±0.14                                   | 0.20±0.04 | 0.72±0.06 |
| PLCL7030 | 3.45±0.12                                   | 0.22±0.03 | 0.62±0.03 |
| PLCL3070 | 3.02±0.15                                   | 0.19±0.02 | 0.59±0.01 |

**Table S3** Organ mass in SD mice with scaffolds for different time 8 weeks.

| Groups   | Organ weight/body weight ratio (g/100g) for |           |           |
|----------|---------------------------------------------|-----------|-----------|
|          | Liver                                       | Spleen    | Kidney    |
| Control  | 3.57±0.50                                   | 0.21±0.03 | 0.68±0.07 |
| PLLA     | 3.32±0.40                                   | 0.20±0.02 | 0.67±0.06 |
| PLCL7030 | 3.29±0.17                                   | 0.22±0.04 | 0.60±0.01 |
| PLCL3070 | 3.28±0.13                                   | 0.22±0.07 | 0.62±0.10 |

**Table S4** Organ mass in SD mice with scaffolds after 12 weeks.

| Groups   | Organ weight/body weight ratio (g/100g) for |           |           |
|----------|---------------------------------------------|-----------|-----------|
|          | Liver                                       | Spleen    | Kidney    |
| Control  | 3.05±0.21                                   | 0.22±0.01 | 0.66±0.06 |
| PLLA     | 3.23±0.25                                   | 0.25±0.02 | 0.64±0.04 |
| PLCL7030 | 3.21±0.16                                   | 0.26±0.04 | 0.62±0.05 |
| PLCL3070 | 2.84±0.13                                   | 0.23±0.01 | 0.60±0.05 |

**Table S5** Reference range of blood routine indexes of SD rats.

| Program                 | Reference range                   |
|-------------------------|-----------------------------------|
| White blood cell        | 2.28~31.58×10 <sup>9</sup> /L     |
| Lymphocyte              | 1.07~24.15×10 <sup>9</sup> /L     |
| Red blood cell          | 6.46~9.37×10 <sup>12</sup> /L     |
| Hemoglobin              | 119.13~173.73 g/L                 |
| Mean corpuscular volume | 48.56~66.50 FL                    |
| Platelets               | 276.13~1102.73×10 <sup>9</sup> /L |
